# Supplementary material for: Association of Childhood Infection With IQ and Adult Nonaffective Psychosis in Swedish Men: A Population-Based Longitudinal Cohort and Co-relative Study
Source: PubMed Central journal article supplement (PMC5875340; doi:10.1001/jamapsychiatry.2017.4491), 2018-02-14
Supplement: jamapsychiatry-75-356-s001.pdf [file jamapsychiatry-75-356-s001.pdf]

## Supplementary Online Content

Khandaker GM, Dalman C, Kappelmann N, et al. Association of childhood infection with IQ and adult nonaffective psychosis in Swedish men: a population-based longitudinal cohort and co-relative study. Published online February 14, 2018. *JAMA Psychiatry*. doi:10.1001/jamapsychiatry.2017.4491

**eFigure 1.** Sample Selection for the Analyses of Childhood Infection, IQ, and Nonaffective Psychosis

**eFigure 2.** Unadjusted Hazard Ratios for Nonaffective Psychoses for Childhood Infection (sample divided into 1-year age bands based on age at infection)

**eFigure 3.** Mean IQ (95% CI) at Conscriptioin for Participants Exposed to Infection in Childhood Grouped by Age at Infection

**eTable 1.** ICD Codes for Hospitalized Cases of Childhood Infection

**eTable 2.** Baseline Characteristics of Sample

**eTable 3.** Association Between Childhood Infection and Risk of Schizophrenia in Adulthood Based on a Sample of 644925 Swedish Men Excluding Cases With Other Nonaffective Psychosis

**eTable 4.** Association Between Childhood Infection and Risk of Other Nonaffective Psychosis in Adulthood Based on a Sample of 646060 Swedish Men Excluding Cases with Schizophrenia

**eTable 5.** Association Between Childhood Infection and Risk of Nonaffective Psychoses in Adulthood Based on a Sample of 647515 Swedish Men

**eTable 6.** Association Between Childhood Infection and IQ at Age 18 Years Based on a Sample of 647515 Swedish Men

**eTable 7.** Association Between Childhood CNS and Non-CNS Infections and Risk of Nonaffective Psychoses in Adulthood

**eTable 8.** Association Between CNS and Non-CNS Infection in Childhood and IQ at Age 18

**eTable 9.** Hazard Ratio (95% CI) for Schizophrenia and Other Nonaffective Psychosis for Each 1-point Increase in Total IQ Score at Conscriptioin

**eTable 10.** Co-relative Control Analyses of Childhood Infection and Adult Nonaffective Psychoses Based on a Sample of 647515 Swedish Men

**eTable 11.** Interaction Analyses of Infection and IQ for the Outcome of Nonaffective Psychoses (N=647515)

**eTable 12.** Mediating Effect of IQ on the Infection-Nonaffective Psychosis Association (N=647515)

This supplementary material has been provided by the authors to give readers additional information about their work.

**eFigure 1.** Sample Selection for the Analyses of Childhood Infection, IQ, and Nonaffective Psychosis

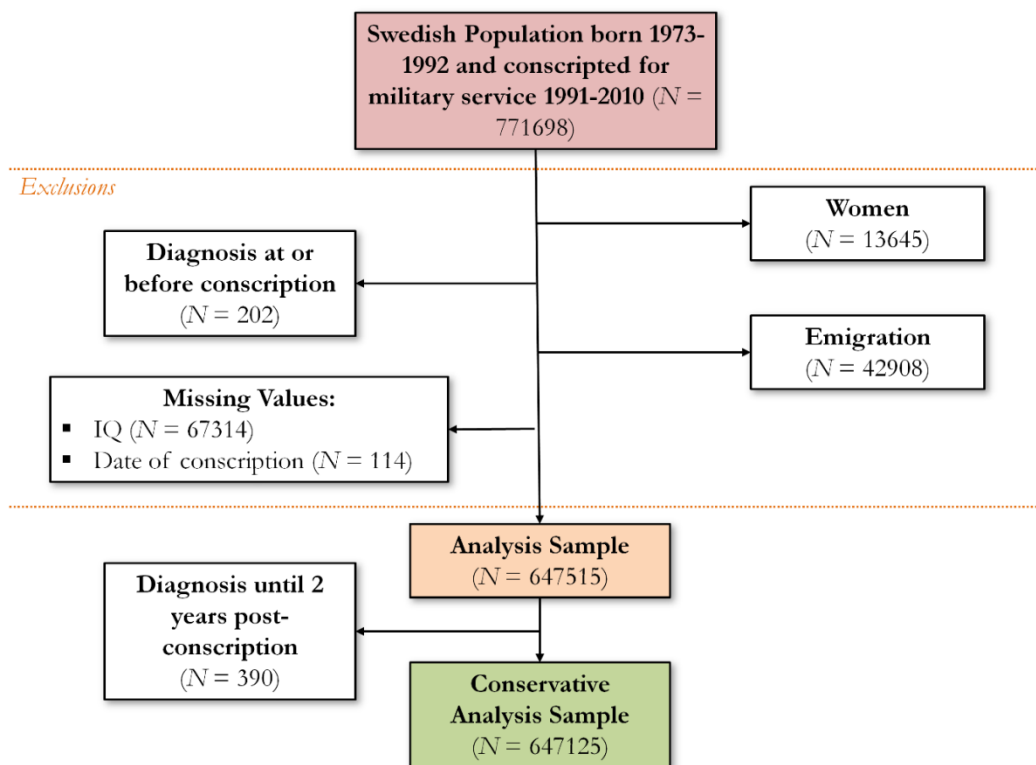

**eFigure 2.** Unadjusted Hazard Ratios for Nonaffective Psychoses for Childhood Infection (sample divided into 1-year age bands based on age at infection)

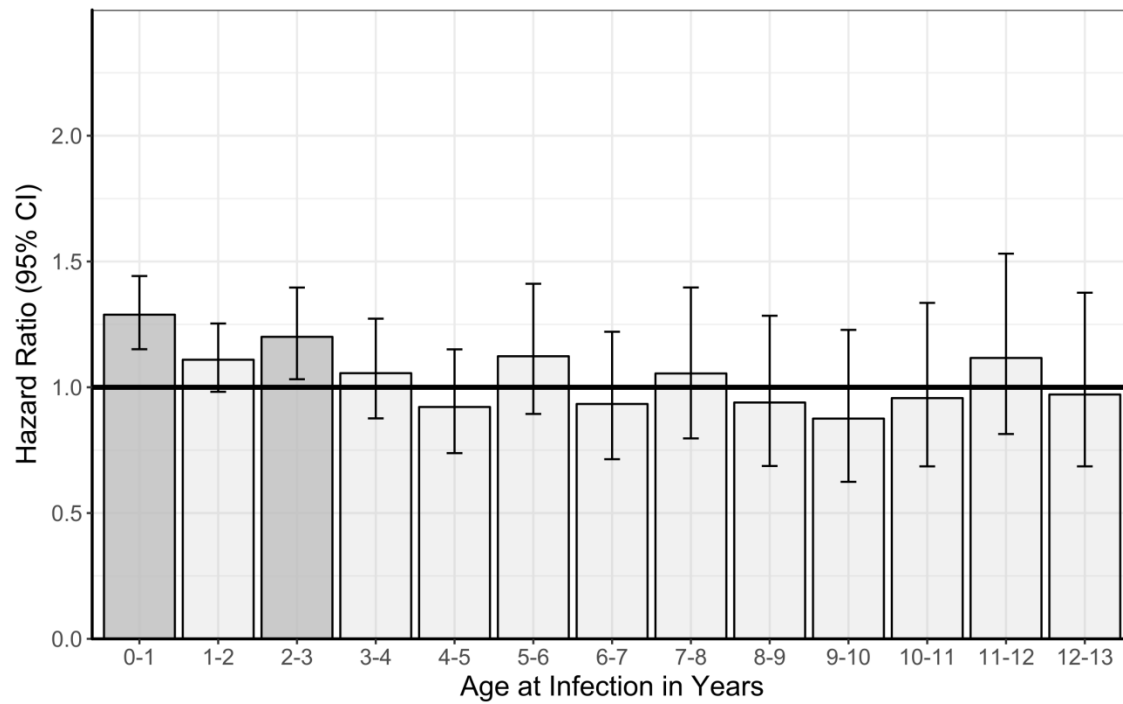

Note: Dark grey bars indicate statistically significant association. The results correspond to unadjusted HR and 95% CI from Cox regression analysis presented in eTable 5.

**eFigure 3.** Mean IQ (95% CI) at Conscription for Participants Exposed to Infection in Childhood Grouped by Age at Infection

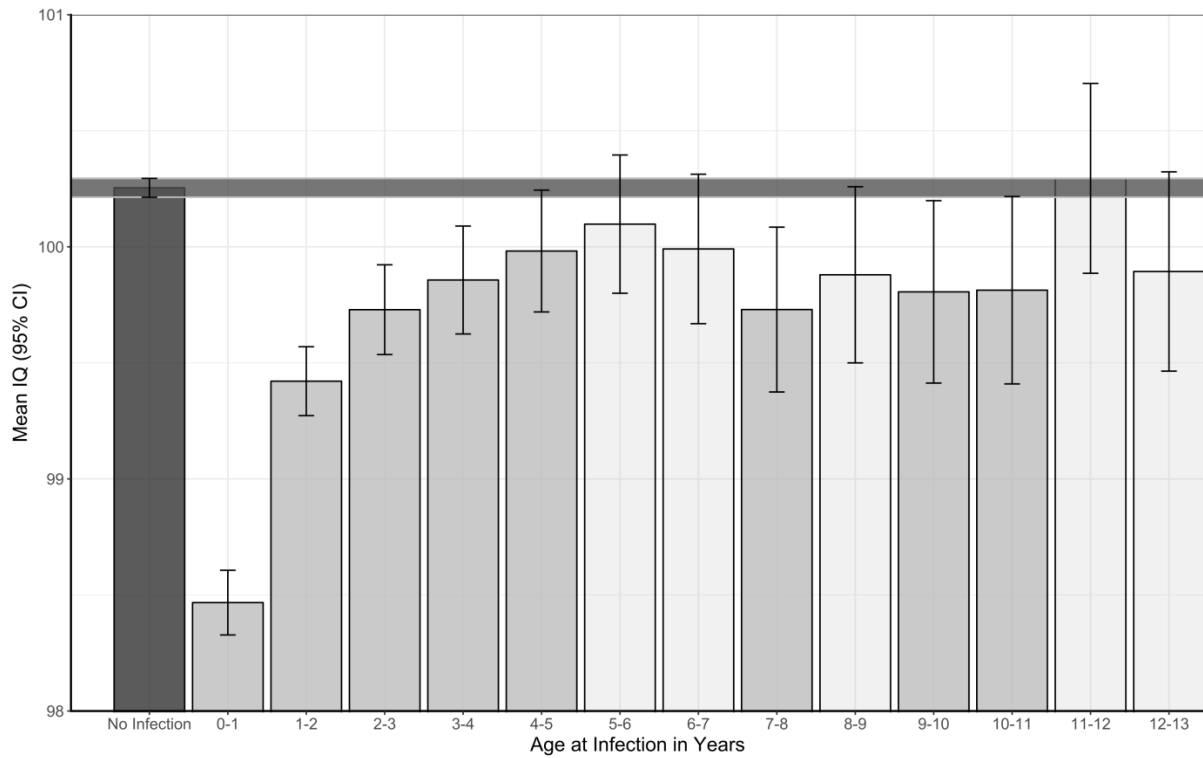

Note: The black bar indicates mean IQ for the unexposed group (i.e., no infection at any age). The grey bars indicate mean IQ for participants exposed to infection grouped by age at infection. Dark grey bars indicate a statistically significant difference in mean IQ for exposure to infection in that particular age compared with unexposed group.

**eTable 1.** ICD Codes for Hospitalised Cases of Childhood Infection

| Type of Infection | ICD Version <sup>1</sup> | Diagnostic Codes for Hospitalised Cases of Childhood Infection                                                                                                                                                                                                                                                                                                                                                                                                                                                                                                                                                                                                                                                                                                |
|-------------------|--------------------------|---------------------------------------------------------------------------------------------------------------------------------------------------------------------------------------------------------------------------------------------------------------------------------------------------------------------------------------------------------------------------------------------------------------------------------------------------------------------------------------------------------------------------------------------------------------------------------------------------------------------------------------------------------------------------------------------------------------------------------------------------------------|
| Any infection     | ICD-8                    | 006.00-007.99, 009.00-009.98, 084.00-087.99, 099.96-099.99, 110.00-130.10, 130.99-131.99, 136.09, 320.88-320.99, 360.00, 380.02-381.99, 384.00-384.08, 420.00-420.09, 421.98, 422.97-422.99, 462.01, 462.09, 463.09, 466.99, 483.99-486.09, 503.00-503.09, 540.00-540.02, 540.04-540.99, 572.99, 686.00-686.98, 761.40, 763.10, 763.98, 778.60 + ICD-8 codes in 'Bacterial infection' and 'Viral infection'.                                                                                                                                                                                                                                                                                                                                                  |
|                   | ICD-9                    | 006-007X, 008W, 009-D, 084-086X, 099E-X, 110-136X, 321A, 321W, 370E-F, X, 372A-D, 380B, C, 381A, 382X, 420- 422X, 462-463, 466-B, 473-X, 483, 485-486, 490, 491B, 540A, X, 572A, 647C, E, W, X, 680A, 711G-X, 727A, 770A, 771C, E-W + ICD-9 codes in 'Bacterial infection' and 'Viral infection'.                                                                                                                                                                                                                                                                                                                                                                                                                                                             |
|                   | ICD-10                   | A06-07.9, A08.5, A09, A59-59.9, A63, A63.8-64, B35-49, B50 -89, B99, G02.1-02.8, G04, G04.9, G05.2, H10.0, H10.3-10.9, H16.2-16.3, H16.9, H32, H60, H60.3, H65.0-65.1, H66.9, I30.0-30.9, I33.0-33.9, I40.0, J02*, J02.8-02.9*, J03*, J03.8-03.9*, J16, J16.8, J18-18.9, J20, J20.8-21, J21.8-21.9, J22, J32-32.9*, J35.0, J37-37.1*, J40-42, K35, K35.9, K75.0, L30.3, M46.5, M65.1, M71.1, O98.3, O98.6-98.9, P23.8-23.9, P37.1-39.9, Z22.4, Z22.8-22.9 + ICD-10 codes in 'Bacterial infection' and 'Viral infection'.                                                                                                                                                                                                                                      |
| Bacterial         | ICD-8                    | 000.01-005.99, 008.00-008.30, 010.99-018.98, 020.00-039.98, 073.99, 076.99, 079.30, 080.99-083.99, 088.99-104.98, 320.00-320.80, 322.00-322.03, 361.00-361.09, 362.02, 366.00, 369.00, 380.00-380.01, 382.00-383.99, 390.97-392.99, 421.00, 461.00-461.09, 462.02, 463.01, 481.99-482.98, 501.99, 508.00-508.02, 510.01-510.09, 511.10, 513.99, 522.50, 527.30, 528.00, 528.30, 540.03, 562.00-562.19, 566.00-566.01, 567.00-567.02, 569.00, 577.01, 590.00-590.99, 595.00-595.02, 597.00, 599.02, 611.00, 611.01, 612.01-614.99, 616.00-616.03, 620.00-620.99, 622.00-622.19, 629.40, 630.00-630.09, 635.00-636.09, 645.90-645.91, 670.00-670.09, 678.02, 680.00-682.99, 684.00-684.09, 710.00-710.09, 720.00-720.29, 732.99, 761.00, 763.00, 998.50, 999.30 |
|                   | ICD-9                    | 001-005X, 008A-F, 010-041X, 073, 076, 078D, J, 790H, 080-083X, 087-099D, 100-104, 245A, 254B, 320-X, 324-X, 360A, 373B, 375D, 376A, 382A-E, 383A-X, 390-392X, 421A, 461-X, 475, 481-482X, 510-X, 511B, 513-B, 522E, H, 526E, 527D, 528A, D, 540B, 562-B, 566, 567-C, 569F, 575A, 590-X, 597A, 595-D, X, 597W, 599A, 611A, 614-F, W-X, 615A, X, 616-X, 634A, 635A, 636A, 637A, 638A, 639A, 646F, G, 647A, B, D, 658E, 659D, 670, 675-B, W-X, 681-686X, 711A, E, 728A, 729E, 730-D, X, 771D, 996G, 998F, 999D                                                                                                                                                                                                                                                   |
|                   | ICD-10                   | A00-05.9, A15-17.9, A20-28.9, A30 -58, A65 -79.9, B95-96.8, E06.0, E32.1, G00-00.9, G01, G04.2, G05.0, G06-06.2*, G07, H00.0, H01.0, H04.3, H05.0, H44.0, H60.0-60.1, H66.0-66.4, H70.0-70.9, I00-02.9, J01-01.9*, J02.0, J03.0, J13-15.9, J16.0, J20.0-20.2, J34.0, J36*, J39.0-39.1, J85.1-85.3, J86-86.9*, K04.6-04.7, K05.2, K11.3, K12.2, K14.0, K35.1, K57-57.9, K61-61.4, K63.0, K65.0*, K81.0, K85, L00 -08.9, M00-00.9, M46.3*, M60.0*, M86-86.9*, N10-12*, N13.6*, N15.1, N15.9, N30-30.3*, N30.8-30.9*, N34-34.1*, N39.0*, , N61, N70-76.8*, N98.0, O07.0, O07.5, O08.0, O23-23.9, O41.1, O75.3, O85-86.8*, O91-91.1, O98.0-98.2, P23.1-23.6, P36, P37.0, T80.2, T81.4, T82.6-82.7, T83.5-83.6, T84.5-84.7, T85.7, T88.0, Z22.0-22.3               |
| Viral             | ICD-8                    | 008.80-008.98, 040.00-043.99, 045.00-065.99, 067.00-072.09, 074.00-075.09, 078.00-079.20, 079.40-079.99, 099.92, 460.99, 464.01-480.99, 508.03, 761.20, 761.30                                                                                                                                                                                                                                                                                                                                                                                                                                                                                                                                                                                                |
|                   | ICD-9                    | 008H-M, 045-066, 070-072X, 074-075, 077-078H, 078W-079X, 279K, 321B-H, 323A, 323C-D, 460, 464-465X, 480-X, 487-W, 647F, G, 711F, 771A, B, 790W                                                                                                                                                                                                                                                                                                                                                                                                                                                                                                                                                                                                                |
|                   | ICD-10                   | A08-08.4, A60-60.9, A63.0, A80-89, A90-99, B00-06.0, B06.8-09, B15-19.9, B20-24, B25-34, B97-97.8, G02.0, G05.1, J00, J04-06.9*, J10-11.8, J12-12.9, J20.3-20.7, J21.0, O35.3, O98.4-98.5, P23.0, P35, Z21, Z22.5-22.6                                                                                                                                                                                                                                                                                                                                                                                                                                                                                                                                        |

|                  |        |                                                                                                                                                                                                                                                                                                                                                                                                                                                        |
|------------------|--------|--------------------------------------------------------------------------------------------------------------------------------------------------------------------------------------------------------------------------------------------------------------------------------------------------------------------------------------------------------------------------------------------------------------------------------------------------------|
| CNS              | ICD-8  | 013.00-013.99, 027.01, 036.00, 090.40, 094.00-094.98, 320.00-320.80, 322.00-322.03, 392.99, 040.00-043.99, 045.00-046.99, 052.00, 054.04, 062.00-065.99, 071.99, 072.01, 075.02, 079.20, 474.99, 084.00, 320.88-320.99                                                                                                                                                                                                                                 |
|                  | ICD-9  | 013-X, 036A, B, 090E, 094-X, 320-X, 324-X, 392-X, 045-049X, 054D, 052B, 053A, 055A, 056A, 071, 072B, C, 321B-H, 323A, 323C, D, 006F, 321A, 321W                                                                                                                                                                                                                                                                                                        |
|                  | ICD-10 | A02.2 (if G01), A17-17.9, A20.3, A22.8, A32.1, A39.0, A39.8 (if G05), A50.4 (if G05.0 or G01), A51.4 (if G01), A52.1 (if G05.0, G01 or F02.8), A54.8 (if G07 or G01), A69.2 (if G01), G00-00.9, G01, G04.2, G05.0, G06-06.2, G07, I02-02.9, A80-89, B00.3-00.4, B01.0-01.1, B02.0-02.1, B05.0-05.1, B06.0, B26.1-26.2, G02.0, G05.1, B58.2, A06.6, B37.5, B38.4, B43.1, B45.1, B46.1, B50.0, B57.4, B60.2, B69.0, B83.2, G02.1-02.8, G04, G04.9, G05.2 |
| Respiratory      | ICD-8  | 010-012, 020.10, 461.00-461.09, 462.02, 463.01, 481.99-482.98, 501.99, 508.00-508.02, 510.01-510.09, 511.10, 513.99, 460.99, 464.01-464.09, 465.99, 470.99-473.99, 480.99, 508.03, 462.01, 462.09, 463.09, 466.99, 483.99-486.09, 502.00-503.09, 519.92, 490.99-491.09                                                                                                                                                                                 |
|                  | ICD-9  | 010-012W, 031A, 033-034B, 052A, 055B, 112E, 122B, 460-466, 475, 481-482X, 510-X, 511B, 513-B, 480-X, 487-W, 462, 463, 466-B, 473-X, 483, 485, 486, 490, 491B                                                                                                                                                                                                                                                                                           |
|                  | ICD-10 | A15-16, A20.2, A21.2, A22.1, A31.0, A37, A38, A48.1, B00.2, B01.2, B05.2, B27, B37.1, B39-42, B44, B45.0, B46.0, B58.3, B59, J01-01.9, J02.0, J03.0, J13-15.9, J16.0, J20.0-20.2, J34.0, J36, J39.0-39.1, J85.1-85.3, J86-86.9, J00, J04-06.9, J10-11.8, J12-12.9, J20.3-20.7, J21.0, , J02, J02.8-02.9, J03, J03.8-03.9, J16, J16.8, J18-18.9, J20, J20.8-21, J21.8-21.9, J22, J32-32.9, J35.0, J37-37.1, J40-42                                      |
| Skin             | ICD-8  | 017.01-017.09, 110-111, 050-057, 680.00-680.90, 681.00-682.99, 684.00-684.09, 686.00-686.98                                                                                                                                                                                                                                                                                                                                                            |
|                  | ICD-9  | 017A, 031B, 050-057, 074D, 091D, 110-111, 112D, 681-682X, 683, 684, 685-686X, 680A                                                                                                                                                                                                                                                                                                                                                                     |
|                  | ICD-10 | A18.4, A20.0, A22.0, A26.0, A31.1, A32, A36.3, B00-09, B35-36, B37.2, B43.0, B43.2, B45.2, B46.3, B55.1, L00, L01-01.1, L02-02.9, L03-03.9, L04-08.9, L70.0, L30.3                                                                                                                                                                                                                                                                                     |
| Genitourinary    | ICD-8  | 090-099, 016, 054.02, 590.00-590.99, 595.00-595.02, 597.00, 599.02, 601.00, 604.00, 604.01, 607.30, 611.00, 611.01, 612.01-614.99, 616.00-616.03, 620.00-620.99, 622.00-622.19, 629.40                                                                                                                                                                                                                                                                 |
|                  | ICD-9  | 016, 054B, 112B, C, 090-099, 131A, 590-X, 597A, 595-D, X, 597W, 599A, 601-D, 603B, 604A, 604X, 607B, C, 608A, E, 611A, 614-F, W-X, 615A, X, 616-X                                                                                                                                                                                                                                                                                                      |
|                  | ICD-10 | A18.0-18.1, A50-64, A70-74, B37.3-37.4, N10-12, N13.6, N15.1, N15.9, N30-30.3, N30.8-30.9, N34-34.1, N39.0, N41-41.3, N43.1, N45.0-45.9, N48.1-48.2, N49-49.9, N61, N70-76.8, N98.0                                                                                                                                                                                                                                                                    |
| Gastrointestinal | ICD-8  | 000-009, 014, 039.92, 127.99, 522.50, 527.30, 528.00, 528.30, 562.00-562.19, 566.00-566.01, 567.00-567.02, 569.00, 577.01, 540.00-540.99, 572.99                                                                                                                                                                                                                                                                                                       |
|                  | ICD-9  | 001-009, 123, 123, 127, 129, 014, 522E, H, 526E, 527D, 528A, D, 540B, 562-B, 566, 567-C, 569F, 575A, 540A, X, 572A                                                                                                                                                                                                                                                                                                                                     |
|                  | ICD-10 | 001-009, 123, 123, 127, 129, 014, 522E, H, 526E, 527D, 528A, D, 540B, 562-B, 566, 567-C, 569F, 575A, 540A, X, 572A                                                                                                                                                                                                                                                                                                                                     |

<sup>1</sup> In Sweden ICD-8 was used from 1969 to 1986, ICD-9 from 1987 to 1996, and ICD-10 from 1997 to date. All diagnoses of post-infection or sequel are excluded.

\* The additional codes, B95-97.8, denotes the infecting organism. Bacteria= B95-96.8, Virus= B97-97.8.

**eTable 2.** Baseline Characteristics of Sample

| Characteristics                                      | Childhood Infection at 0-13 Years |                |                     |         |
|------------------------------------------------------|-----------------------------------|----------------|---------------------|---------|
|                                                      | Exposed                           | Unexposed      | $\chi^2$ -Statistic | P-value |
| Sample, No. (%)                                      | 153460 (23.70)                    | 494055 (76.30) | -                   | -       |
| Winter Birth, No. (%)                                | 80166 (52.24)                     | 262241 (53.08) | 33.15               | <0.001  |
| Household Crowding, No. (%)                          |                                   |                | 1026.10             | <0.001  |
| Not overcrowded                                      | 84833 (55.28)                     | 295520 (59.82) |                     |         |
| Overcrowded                                          | 3183 (2.07)                       | 10275 (2.08)   |                     |         |
| Unknown                                              | 65444 (42.65)                     | 188260 (38.11) |                     |         |
| Parental Socioeconomic Status, No. (%)               |                                   |                | 1256.00             | <0.001  |
| Worker                                               | 28139 (18.33)                     | 95065 (19.24)  |                     |         |
| White Collar                                         | 46909 (30.57)                     | 166122 (33.62) |                     |         |
| Business owner                                       | 8720 (5.68)                       | 33005 (6.68)   |                     |         |
| Unknown                                              | 69692 (45.41)                     | 199863 (40.45) |                     |         |
| Migrant Parents, No. (%)                             | 22951 (14.96)                     | 64915 (13.14)  | 329.26              | <0.001  |
| Parental History of Non-Affective Psychosis, No. (%) | 3076 (2.00)                       | 9027 (1.83)    | 19.97               | <0.001  |

**eTable 3.** Association Between Childhood Infection and Risk of Schizophrenia in Adulthood Based on a Sample of 644925 Swedish Men Excluding Cases With Other Nonaffective Psychosis

| Age At Infection | Exposed to Infection,<br>No. (%) | Unadjusted Analysis   |                 | Adjusted Analysis <sup>1</sup> |                 |
|------------------|----------------------------------|-----------------------|-----------------|--------------------------------|-----------------|
|                  |                                  | Hazard Ratio (95% CI) | <i>P</i> -value | Hazard Ratio (95% CI)          | <i>P</i> -value |
| All (0-13 years) | 152775 (23.69)                   | 1.16 (1.03-1.30)      | 0.014           | 1.13 (1.00-1.27)               | 0.049           |
| 0-1 years        | 48906 (7.58)                     | 1.27 (1.06-1.53)      | 0.011           | 1.22 (1.01-1.47)               | 0.038           |
| 2-4 years        | 83629 (12.97)                    | 1.00 (0.86-1.17)      | 0.983           | 0.98 (0.83-1.14)               | 0.757           |
| 5-9 years        | 34118 (5.29)                     | 1.06 (0.86-1.32)      | 0.577           | 1.05 (0.84-1.30)               | 0.680           |
| 10-13 years      | 14914 (2.31)                     | 1.05 (0.76-1.45)      | 0.752           | 1.05 (0.76-1.45)               | 0.765           |

<sup>1</sup> Regression models have been adjusted for household crowding, winter birth, parental socioeconomic status, migration status, and parental history of non-affective psychoses.



**eTable 4.** Association Between Childhood Infection and Risk of Other Nonaffective Psychosis in Adulthood Based on a Sample of 646060 Swedish Men Excluding Cases with Schizophrenia

| Age At Infection | Exposed to Infection,<br>No. (%) | Unadjusted Analysis   |                 | Adjusted Analysis <sup>1</sup> |                 |
|------------------|----------------------------------|-----------------------|-----------------|--------------------------------|-----------------|
|                  |                                  | Hazard Ratio (95% CI) | <i>P</i> -value | Hazard Ratio (95% CI)          | <i>P</i> -value |
| All (0-13 years) | 153088 (23.70)                   | 1.24 (1.14-1.35)      | <0.001          | 1.17 (1.08-1.28)               | <0.001          |
| 0-1 years        | 49004 (7.58)                     | 1.30 (1.13-1.50)      | <0.001          | 1.17 (1.02-1.35)               | 0.028           |
| 2-4 years        | 83833 (12.98)                    | 1.24 (1.11-1.38)      | <0.001          | 1.19 (1.07-1.33)               | 0.002           |
| 5-9 years        | 34179 (5.29)                     | 0.98 (0.83-1.15)      | 0.769           | 0.99 (0.83-1.17)               | 0.874           |
| 10-13 years      | 14941 (2.31)                     | 0.98 (0.77-1.26)      | 0.878           | 1.00 (0.78-1.28)               | 0.986           |

<sup>1</sup> Regression models have been adjusted for household crowding, winter birth, parental socioeconomic status, migration status, and parental history of non-affective psychoses.

**eTable 5.** Association Between Childhood Infection and Risk of Nonaffective Psychoses in Adulthood Based on a Sample of 647515 Swedish Men

| Age At Infection | Exposed to Infection,<br>No. (%) | Unadjusted Analysis   |                 | Adjusted Analysis <sup>1</sup> |                 |
|------------------|----------------------------------|-----------------------|-----------------|--------------------------------|-----------------|
|                  |                                  | Hazard Ratio (95% CI) | <i>P</i> -value | Hazard Ratio (95% CI)          | <i>P</i> -value |
| All (0-13 years) | 153460 (23.70)                   | 1.21 (1.13-1.30)      | <0.001          | 1.16 (1.08-1.24)               | <0.001          |
| 0-1 years        | 49127 (7.59)                     | 1.29 (1.15-1.44)      | <0.001          | 1.17 (1.06-1.33)               | 0.003           |
| 1-2 years        | 43491 (6.72)                     | 1.12 (0.98-1.25)      | 0.095           | 1.06 (0.94-1.20)               | 0.326           |
| 2-3 years        | 24727 (3.82)                     | 1.20 (1.03-1.40)      | 0.018           | 1.18 (1.01-1.37)               | 0.034           |
| 3-4 years        | 16831 (2.60)                     | 1.06 (0.88-1.27)      | 0.566           | 1.05 (0.87-1.26)               | 0.630           |
| 4-5 years        | 13072 (2.02)                     | 0.92 (0.74-1.15)      | 0.472           | 0.92 (0.74-1.15)               | 0.484           |
| 5-6 years        | 10049 (1.55)                     | 1.12 (0.89-1.41)      | 0.318           | 1.13 (0.90-1.42)               | 0.285           |
| 6-7 years        | 8534 (1.32)                      | 0.93 (0.71-1.22)      | 0.616           | 0.93 (0.71-1.22)               | 0.614           |
| 7-8 years        | 6979 (1.08)                      | 1.05 (0.80-1.40)      | 0.709           | 1.06 (0.80-1.40)               | 0.684           |
| 8-9 years        | 6086 (0.94)                      | 0.94 (0.69-1.28)      | 0.695           | 0.93 (0.68-1.28)               | 0.667           |
| 9-10 years       | 5659 (0.87)                      | 0.88 (0.62-1.23)      | 0.442           | 0.87 (0.62-1.23)               | 0.435           |
| 10-11 years      | 5349 (0.83)                      | 0.96 (0.69-1.34)      | 0.796           | 0.95 (0.68-1.33)               | 0.777           |
| 11-12 years      | 5209 (0.80)                      | 1.12 (0.81-1.53)      | 0.494           | 1.14 (0.83-1.56)               | 0.413           |
| 12-13 years      | 4721 (0.73)                      | 0.97 (0.69-1.38)      | 0.870           | 0.99 (0.70-1.40)               | 0.936           |

<sup>1</sup> Regression models have been adjusted for household crowding, winter birth, parental socioeconomic status, migration status, and parental history of non-affective psychoses.

**eTable 6.** Association Between Childhood Infection and IQ at Age 18 Years Based on a Sample of 647515 Swedish Men

| Age at Infection | Exposed to Infection |               | Unexposed to Infection |                | Unadjusted Analysis         |         | Adjusted Analysis <sup>1</sup> |         |
|------------------|----------------------|---------------|------------------------|----------------|-----------------------------|---------|--------------------------------|---------|
|                  | Sample               | Mean IQ (SD)  | Sample                 | Mean IQ (SD)   | Mean Difference<br>(95% CI) | P-Value | Mean Difference<br>(95% CI)    | P-Value |
| All (0-13 years) | 153460               | 99.18 (15.02) | 494055                 | 100.26 (14.98) | -1.08 (-1.16, -0.99)        | <0.001  | -0.98 (-1.07, -0.90)           | <0.001  |
| 0-1 years        | 49127                | 98.20 (15.10) | 494055                 | 100.26 (14.98) | -1.79 (-1.93, -1.65)        | <0.001  | -1.58 (-1.71, -1.44)           | <0.001  |
| 1-2 years        | 43491                | 98.91 (15.04) | 494055                 | 100.26 (14.98) | -0.83 (-0.98, -0.68)        | <0.001  | -0.78 (-0.93, -0.64)           | <0.001  |
| 2-3 years        | 24727                | 99.14 (15.09) | 494055                 | 100.26 (14.98) | -0.53 (-0.72, -0.33)        | <0.001  | -0.52 (-0.71, -0.33)           | <0.001  |
| 3-4 years        | 16831                | 99.25 (15.11) | 494055                 | 100.26 (14.98) | -0.40 (-0.63, -0.16)        | <0.001  | -0.36 (-0.59, -0.14)           | 0.002   |
| 4-5 years        | 13072                | 99.38 (14.96) | 494055                 | 100.26 (14.98) | -0.27 (-0.53, -0.01)        | 0.042   | -0.27 (-0.52, -0.01)           | 0.043   |
| 5-6 years        | 10049                | 99.53 (15.12) | 494055                 | 100.26 (14.98) | -0.16 (-0.45, 0.14)         | 0.303   | -0.12 (-0.41, 0.17)            | 0.422   |
| 6-7 years        | 8534                 | 99.46 (15.05) | 494055                 | 100.26 (14.98) | -0.26 (-0.59, 0.06)         | 0.109   | -0.13 (-0.44, 0.19)            | 0.434   |
| 7-8 years        | 6979                 | 99.24 (15.11) | 494055                 | 100.26 (14.98) | -0.52 (-0.88, -0.17)        | 0.004   | -0.40 (-0.74, -0.05)           | 0.025   |
| 8-9 years        | 6086                 | 99.43 (14.96) | 494055                 | 100.26 (14.98) | -0.37 (-0.75, 0.00)         | 0.053   | -0.26 (-0.63, 0.11)            | 0.162   |
| 9-10 years       | 5659                 | 99.38 (14.97) | 494055                 | 100.26 (14.98) | -0.45 (-0.84, -0.06)        | 0.025   | -0.36 (-0.74, 0.03)            | 0.068   |
| 10-11 years      | 5349                 | 99.42 (14.82) | 494055                 | 100.26 (14.98) | -0.44 (-0.84, -0.04)        | 0.032   | -0.32 (-0.71, 0.08)            | 0.117   |
| 11-12 years      | 5209                 | 99.92 (15.07) | 494055                 | 100.26 (14.98) | 0.04 (-0.37, 0.45)          | 0.845   | 0.10 (-0.30, 0.50)             | 0.632   |
| 12-13 years      | 4721                 | 99.55 (14.83) | 494055                 | 100.26 (14.98) | -0.36 (-0.79, 0.07)         | 0.100   | -0.24 (-0.66, 0.18)            | 0.259   |

<sup>1</sup> Regression models have been adjusted for household crowding, winter birth, parental socioeconomic status, migration status, and parental history of non-affective psychoses.

**eTable 7.** Association Between Childhood CNS and Non-CNS Infections and Risk of Nonaffective Psychoses in Adulthood

| Type of Infection    | Sample Size <sup>1</sup> | Exposed to Infection,<br>No. (%) | Unadjusted Analysis   |         | Adjusted Analysis <sup>2</sup> |         |
|----------------------|--------------------------|----------------------------------|-----------------------|---------|--------------------------------|---------|
|                      |                          |                                  | Hazard Ratio (95% CI) | P-value | Hazard Ratio (95% CI)          | P-value |
| <u>All NAP</u>       |                          |                                  |                       |         |                                |         |
| All                  | 647515                   | 153460 (23.70)                   | 1.21 (1.13-1.30)      | <0.001  | 1.16 (1.08-1.24)               | <0.001  |
| CNS                  | 498718                   | 4663 (0.93)                      | 1.04 (0.74-1.48)      | 0.811   | 1.04 (0.74-1.48)               | 0.817   |
| Non-CNS              | 644554                   | 150499 (23.35)                   | 1.22 (1.14-1.31)      | <0.001  | 1.16 (1.08-1.25)               | <0.001  |
| <u>Schizophrenia</u> |                          |                                  |                       |         |                                |         |
| All                  | 644925                   | 152775 (23.69)                   | 1.16 (1.03-1.30)      | 0.014   | 1.13 (1.00-1.27)               | 0.049   |
| CNS                  | 496792                   | 4642 (0.93)                      | 1.00 (0.55-1.81)      | 1.00    | 0.98 (0.54-1.78)               | 0.949   |
| Non-CNS              | 641972                   | 149822 (23.34)                   | 1.16 (1.03-1.30)      | 0.017   | 1.12 (1.00-1.27)               | 0.056   |
| <u>Other NAP</u>     |                          |                                  |                       |         |                                |         |
| All                  | 646060                   | 153088 (23.70)                   | 1.24 (1.14-1.35)      | <0.001  | 1.17 (1.08-1.28)               | <0.001  |
| CNS                  | 497624                   | 4652 (0.93)                      | 1.07 (0.69-1.16)      | 0.765   | 1.08 (0.70-1.66)               | 0.737   |
| Non-CNS              | 643108                   | 150136 (23.35)                   | 1.25 (1.15-1.37)      | <0.001  | 1.19 (1.09-1.30)               | <0.001  |

<sup>1</sup> The sample for analysis of CNS infection excludes participants with non-CNS infection and *vice versa*; the sample for analysis of schizophrenia excludes participants with other NAP and *vice versa*.

<sup>2</sup> Regression models have been adjusted for household crowding, winter birth, parental socioeconomic status, migration status, and parental history of non-affective psychoses.

**eTable 8.** Association Between CNS and Non-CNS Infection in Childhood and IQ at Age 18

| Type of Infection | Exposed to Infection |               | Unexposed to Infection |                | Unadjusted Analysis      |                 | Adjusted Analysis <sup>1</sup> |                 |
|-------------------|----------------------|---------------|------------------------|----------------|--------------------------|-----------------|--------------------------------|-----------------|
|                   | Sample               | Mean IQ (SD)  | Sample                 | Mean IQ (SD)   | Mean Difference (95% CI) | <i>P</i> -Value | Mean Difference (95% CI)       | <i>P</i> -Value |
| All               | 153460               | 99.18 (15.02) | 494055                 | 100.26 (14.98) | -1.08 (-1.16, -0.99)     | <0.001          | -0.98 (-1.07, -0.90)           | <0.001          |
| CNS               | 4663                 | 99.35 (14.68) | 494055                 | 100.26 (14.98) | -0.91 (-1.34, -0.47)     | <0.001          | -0.86 (-1.28, -0.44)           | <0.001          |
| Non-CNS           | 150499               | 99.17 (15.03) | 494055                 | 100.26 (14.98) | -1.09 (-1.17, -1.00)     | <0.001          | -0.99 (-1.07, -0.90)           | <0.001          |

<sup>1</sup> Regression models have been adjusted for household crowding, winter birth, parental socioeconomic status, migration status, and parental history of non-affective psychoses.

**eTable 9.** Hazard Ratio (95% CI) for Schizophrenia and Other Nonaffective Psychosis for Each 1-point Increase in Total IQ Score at Conscription

| Outcome       | Sample Size | No. of Cases (%) | Unadjusted Analysis   |                 | Adjusted Analysis After Excluding Prodromal Cases <sup>1</sup> |                 |
|---------------|-------------|------------------|-----------------------|-----------------|----------------------------------------------------------------|-----------------|
|               |             |                  | Hazard Ratio (95% CI) | <i>P</i> -value | Hazard Ratio (95% CI)                                          | <i>P</i> -value |
| All NAP       | 647515      | 4045 (0.62)      | 0.975 (0.973-0.977)   | <0.001          | 0.976 (0.974-0.978)                                            | <0.001          |
| Schizophrenia | 644925      | 1455 (0.22)      | 0.976 (0.974-0.978)   | <0.001          | 0.976 (0.972-0.980)                                            | <0.001          |
| Other NAP     | 646060      | 2590 (0.40)      | 0.975 (0.973-0.978)   | <0.001          | 0.975 (0.973-0.978)                                            | <0.001          |

<sup>1</sup> Regression models have been adjusted for household crowding, winter birth, parental socioeconomic status, migration status, and parental history of non-affective psychoses and excluded 390 individuals who were diagnosed with NAP within 2 years of conscription.

**eTable 10.** Co-relative Control Analyses of Childhood Infection and Adult Nonaffective Psychoses Based on a Sample of 647515 Swedish Men

| Groups                     | Sample | Hazard Ratio (95% CI)             |                                                 |                               |
|----------------------------|--------|-----------------------------------|-------------------------------------------------|-------------------------------|
|                            |        | Age at Infection 0-13 Years (All) | Age at Infection 0-4 Years (“Sensitive Period”) | Age at Infection 5-13 Years   |
| General Population         | 647515 | 1.21 (1.13-1.30)                  | 1.24 (1.15-1.34)                                | 1.04 (0.92-1.16)              |
| Cousins <sup>1</sup>       | 304486 | 1.08 (0.97-1.20)                  | 1.07 (0.94-0.21)                                | 1.00 (0.83-1.21) <sup>2</sup> |
| Half Siblings <sup>1</sup> | 21336  | 1.03 (0.72-1.48)                  | 0.98 (0.67-1.44)                                | 1.25 (0.58-2.67)              |
| Full Siblings <sup>1</sup> | 80288  | 1.23 (1.00-1.54)                  | 1.32 (1.02-1.71)                                | 1.00 (0.68-1.46)              |

<sup>1</sup> Co-relative analyses were based on cousin, half-sibling and full-sibling pairs who were discordant for infection (i.e., for each relative pair, one member was exposed to infection and the other was not exposed to infection at any age).

<sup>2</sup> The proportionality assumption for Cox regression was violated for this model, so this particular hazard ratio needs to be interpreted with care.

**eTable 11.** Interaction Analyses of Infection and IQ for the Outcome of Nonaffective Psychoses (N=647515)

| Predictor                   | Estimates for Non-Affective Psychosis |                      |         |
|-----------------------------|---------------------------------------|----------------------|---------|
|                             | B (SE)                                | OR (95% CI)          | P-value |
| Intercept                   | -5.163 (0.019)                        | -                    | <0.001  |
| Childhood infection         | 0.065 (0.040)                         | 1.067 (0.987, 1.153) | 0.102   |
| IQ†                         | 0.025 (0.001)                         | 1.025 (1.023, 1.028) | <0.001  |
| Multiplicative Interaction‡ | 0.006 (0.002)                         | 1.006 (1.001, 1.011) | 0.020   |
| RERI                        | 0.008 (0.002)                         | -                    | 0.001   |

† IQ has been centred (i.e. Mean=0 and SD=15), and reversed (i.e. OR=effect for each one-point decrease) to allow interpretation of the infection main effects as well as the interaction.

‡ The OR for multiplicative interaction represents risk of non-affective psychoses for every 1-point decrease in IQ for those exposed to infection in addition to the main effects of IQ and infection on psychosis risk.



**eTable 12.** Mediating Effect of IQ on the Infection-Nonaffective Psychosis Association (N=647515)

| <b>Effect of Childhood Infection</b> | <b>Estimates for Non-Affective Psychosis,<br/><math>\beta</math> (SE)</b> | <b>P-value</b> |
|--------------------------------------|---------------------------------------------------------------------------|----------------|
| Direct Effect                        | 0.106 (0.035)                                                             | 0.002          |
| Indirect Effect via IQ               | 0.028 (0.002)                                                             | <0.001         |
| Total Effect                         | 0.134 (0.035)                                                             | <0.001         |
